# Supplementary material for: Suppressor of Ty 16 promotes lung cancer malignancy and is negatively regulated by miR‐1227‐5p
Source: PubMed Central journal article supplement — Cancer Sci. 2020 Sep 17;111(11):4075–87. doi: 10.1111/cas.14627 (PMC7648015; doi:10.1111/cas.14627), 2020-09-17
Supplement: CAS-111-4075-s001.pdf [file CAS-111-4075-s001.pdf]

## Supplementary Materials

### Supplementary Figures

## Figure S1

**A**

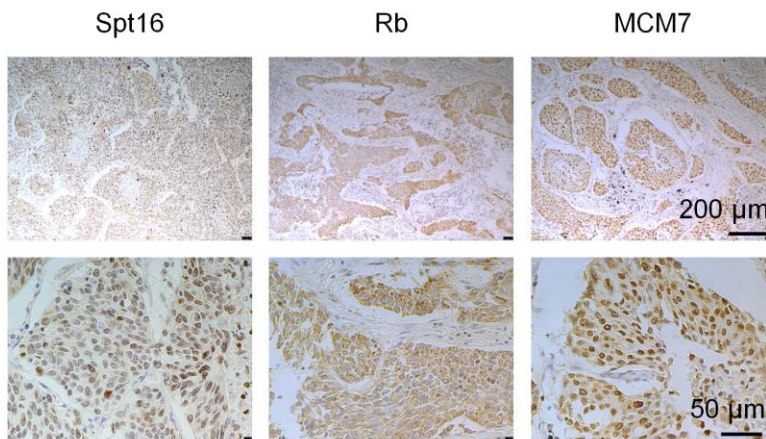

**B**

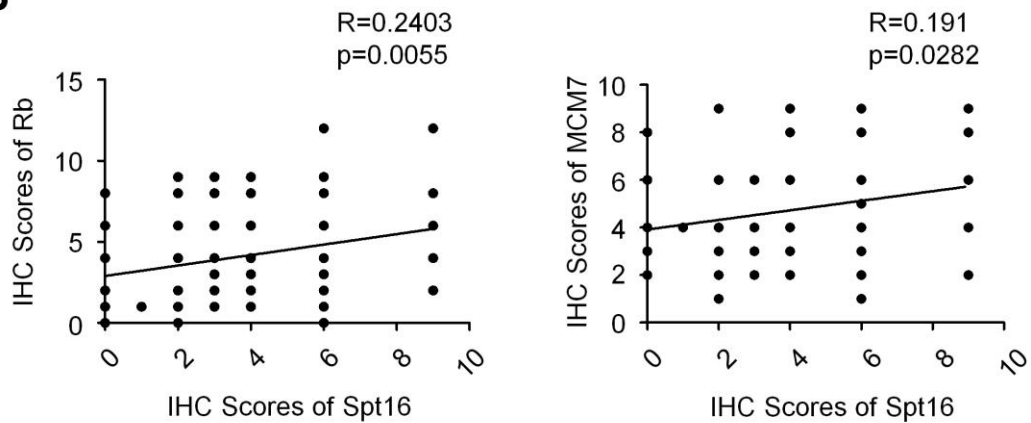

**Figure S1. The levels of Spt16, Rb, and MCM7 in human lung cancer tissues.**

**A**, IHC staining analysis for 147 human lung cancer specimens with antibodies against Spt16, Rb, and MCM7 as indicated.

**B**, The levels of Spt16, Rb, and MCM7 were quantified.

**Figure S2**

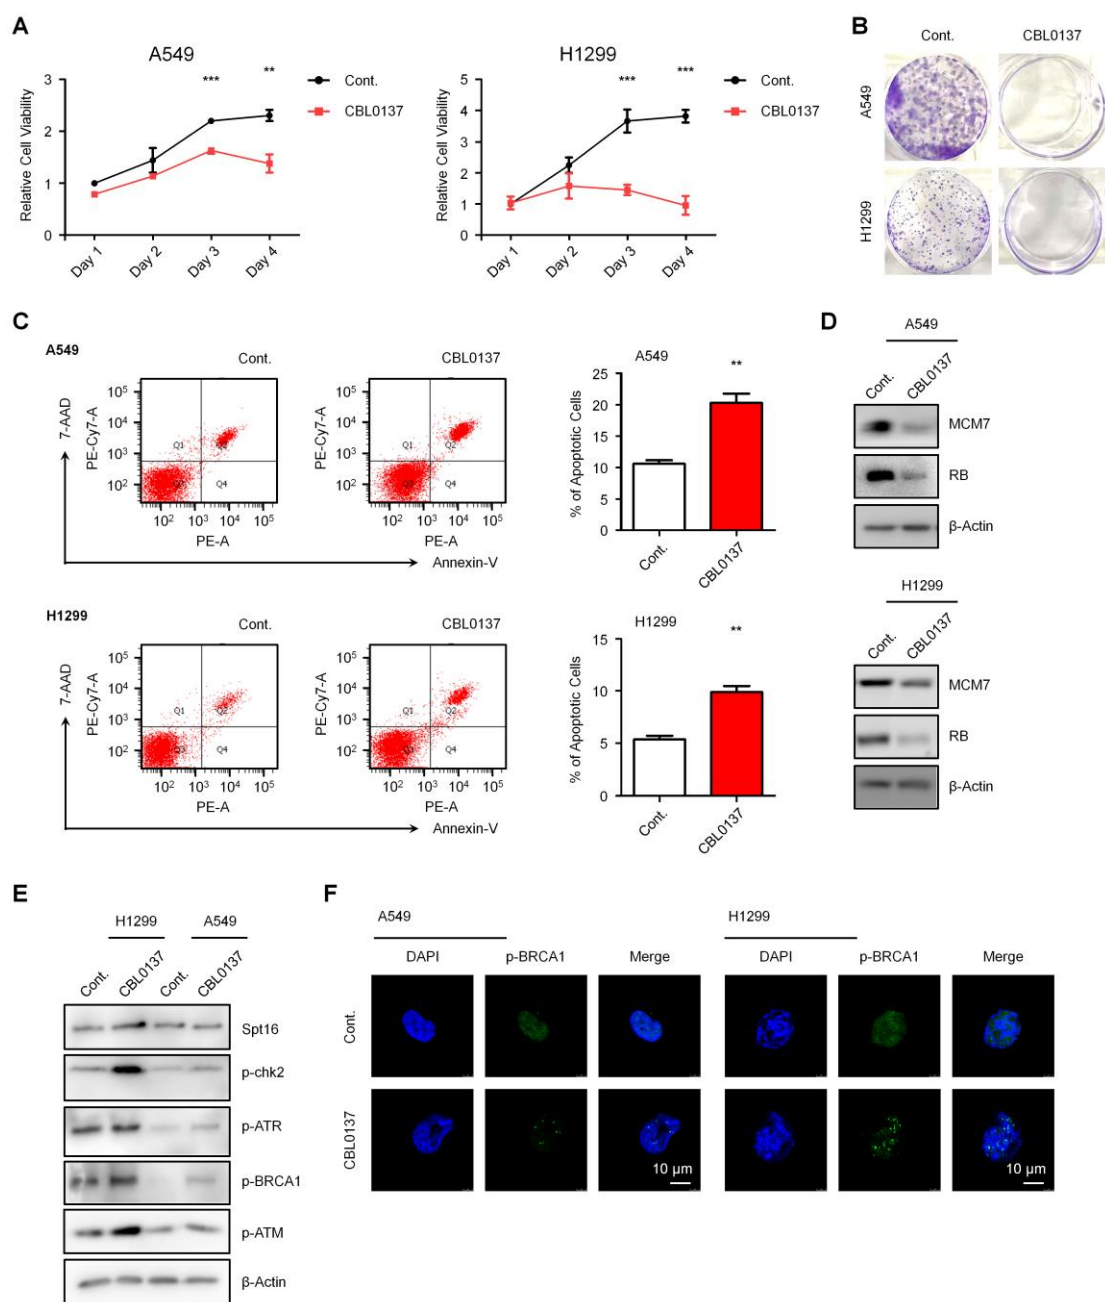

**Figure S2. Treatment with CBL0137 inhibited cell growth, stimulated apoptosis, and activated DDR in human lung cancer cells.**

**A**, MTT analyses in A549 and NCI-H1299 lung cancer cells treated with 0.3  $\mu$ M CBL0137 as indicated.

**B**, Colony formation assays in A549 and NCI-H1299 cells treated with 0.3  $\mu$ M CBL0137 as indicated.

**C**, Flow cytometry (FACS) analyses with Annexin-V and 7-AAD double staining in A549 and NCI-H1299 cells treated with 0.3  $\mu$ M CBL0137 for 48 h as indicated to determine the

effects of CBL0137 on cell apoptosis.

**D and E**, Western blot analyses in A549 and NCI-H1299 cells treated with 0.3  $\mu$ M CBL0137 for 48 h as indicated.

**F**, Immunofluorescence (IF) analyses with phosphorylated BRCA1 (p-BRCA1) antibodies in A549 and NCI-H1299 cells treated with 0.3  $\mu$ M CBL0137 for 48 h as indicated.

**Figure S3**

**A**

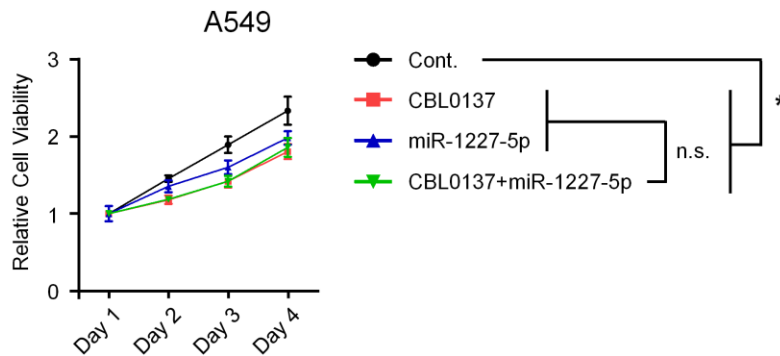

**B**

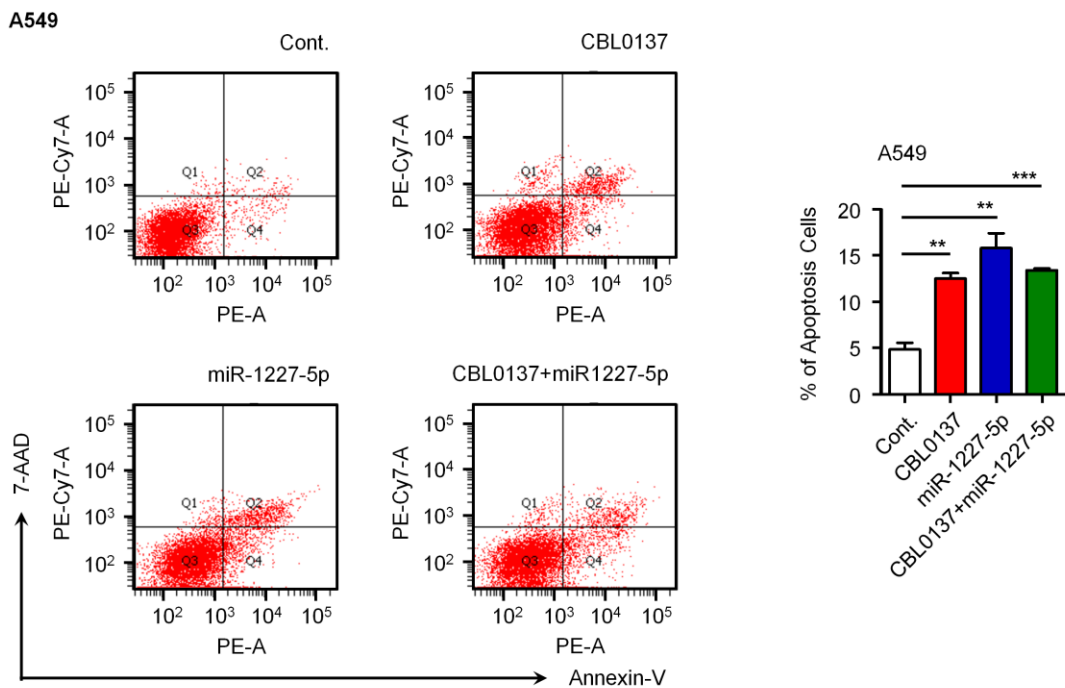

**Figure S3. The combinatorial effect of miR-1227-5p induction and CBL0317 treatment on cell growth and apoptosis.**

**A**, MTT analyses in A549 lung cancer cells treated with 0.3  $\mu$ M CBL0137, or transfected with miR-1227-5p, or combined (transfected with miR-1227-5p and treated with CBL0137) as indicated.

**B**, A549 cells treated as in A were subjected to Flow cytometry (FACS) analyses with Annexin-V and 7-AAD double staining to determine the effects of CBL0137 on cell apoptosis.

**Table S1. Sequences of siRNAs and shRNAs.**

| <b>Name</b> | <b>Sequences</b>      |
|-------------|-----------------------|
| siSpt16-#1  | CGAGUGAAGAGACUGUACATT |
| siSpt16-#2  | GAGUCAUGGAAAUAGUUGATT |
| shSpt16     | CGAGTGAAGAGACTGTACA   |

**Table S2. Primer sequences used for RT-qPCR analyses.**

| <b>Primer Name</b> | <b>Sequences</b>                                                     |
|--------------------|----------------------------------------------------------------------|
| GAPDH              | Forward: CTCCTCCACCTTTGACGCTG,<br>Reverse: TCCTCTTGTGCTCTTGCTGG.     |
| Spt16              | Forward: TCAATGGCTTCGCTTCACATCTG,<br>Reverse: CATCCGTGTGCCGCTTCTTCC. |
| MCM7               | Forward: GCTGATGCCGTACAAGAG,<br>Reverse: AGCAGGGTACTGGTTCTG.         |
| Rb                 | Forward: GACCAACTGATCACCTTGAATC,<br>Reverse: ATTTCAATGGCTTCTGGGTCTG. |
